# Supplementary material for: Patterns of contribution to citizen science biodiversity projects increase understanding of volunteers’ recording behaviour
Source: PubMed Central journal article supplement (PMC5020317; doi:10.1038/srep33051), 2016-09-13
Supplement: srep33051-s1.pdf [file srep33051-s1.pdf]

## Supplementary Information

Patterns of contribution to citizen science biodiversity projects increase understanding of volunteers' recording behaviour.

### Authors:

\*Elizabeth H. Boakes<sup>a</sup>, Gianfranco Gliozzo<sup>b</sup>, Valentine Seymour<sup>c</sup>, Martin Harvey<sup>d</sup>, Chloë Smith<sup>e</sup>, David B. Roy<sup>f</sup> and Muki Haklay<sup>c</sup>

<sup>a</sup>Centre for Biodiversity & Environment Research, Department of Genetics, Evolution & Environment, University College London, Gower Street, London WC1E 6BT, UK, [e.boakes@ucl.ac.uk](mailto:e.boakes@ucl.ac.uk)

<sup>b</sup>Department of Computer Science, University College London, Gower Street, London WC1E 6BT, UK, [g.gliozzo@ucl.ac.uk](mailto:g.gliozzo@ucl.ac.uk)

<sup>c</sup>Department of Civil, Environmental and Geomatic Engineering, University College London, Gower Street, London WC1E 6BT, UK, [valentine.seymour.12@ucl.ac.uk](mailto:valentine.seymour.12@ucl.ac.uk); [m.haklay@ucl.ac.uk](mailto:m.haklay@ucl.ac.uk)

<sup>d</sup>Faculty of Science, The Open University, Walton Hall, Milton Keynes, MK7 6AA, UK, [marharv@ceh.ac.uk](mailto:marharv@ceh.ac.uk)

<sup>e</sup>Greenspace Information for Greater London CIC, Dean Bradley House, 52 Horseferry Road, London, SW1P 2AF, [chloe.smith@gigl.org.uk](mailto:chloe.smith@gigl.org.uk)

<sup>f</sup>Biological Records Centre, NERC Centre for Ecology and Hydrology Wallingford, Crowmarsh Gifford, Wallingford, Oxon, OX10 8BB, UK, [dbr@ceh.ac.uk](mailto:dbr@ceh.ac.uk)

Corresponding author: Elizabeth Boakes, [e.boakes@ucl.ac.uk](mailto:e.boakes@ucl.ac.uk), +44 (0)776 202 1139

S1. The informal taxonomic groupings.

Acarine (Acari)

Alga

Amphibian

Annelid

Bird

Bony fish (Actinopterygii)

Bryozoan

Centipede

Chromist

Clubmoss

Colenterate (=cnidarian)

Conifer

Crustacean

False scorpion (Pseudoscorpiones)

Fern

Flatworm (Turbellaria)

Flowering plant

Fungus

Ginkgo

Harvestman (Opiliones)

Horsetail

Insect – alderfly (Megaloptera)

Insect – beetle (Coleoptera)

Insect – booklouse (Psocoptera)

Insect – butterfly

Insect – caddis fly (Trichoptera)

Insect – cockroach (Dictoptera)

Insect – dragonfly (Odonata)

Insect – earwig (Dermaptera)

Insect – hymenopteran

Insect – lacewing (Neuroptera)

Insect – mayfly (Ephemeroptera)

Insect – moth

Insect – orthopteran

Insect – scorpion fly (Mecoptera)

Insect – silverfish (Thysanura)

Insect – snakefly (Raphidioptera)

Insect – true bug (Hemiptera)

Insect – true fly (Diptera)

Jawless fish (Agnatha)

Lichen

Liverwort

Marine mammal

Millipede

Mollusc

Moss

Reptile

Roundworm (Nematoda)

Slime mould

Spider (Araneae)

Springtail (Collembola)

Stonewort

Symphylan

Terrestrial mammal

Two-tailed bristletail (Diplura)

S2. The ten grid cells with the highest number of records, number of volunteers, and taxonomic richness.

| Observations |                                | Volunteers |                                | Taxonomic Richness |                             |
|--------------|--------------------------------|------------|--------------------------------|--------------------|-----------------------------|
| TQ2277       | The London Wetland Centre      | TQ2277     | The London Wetland Centre      | TQ2967             | Mitcham Common              |
| TQ2596       | High Barnet                    | TQ5280     | Rainham Marshes Nature Reserve | TQ2868             | Mitcham Common              |
| TQ5280       | Rainham Marshes Nature Reserve | TQ0493     | Stocker's Lake                 | TQ4187             | Wanstead Park               |
| TQ1884       | Alperton (Grand Union Canal?)  | TQ2073     | Richmond Park                  | TQ1583             | Grand Union Canal, Perivale |
| TQ2966       | Beddington Sewage Works        | TQ3589     | Walthamstow Reservoirs         | TQ2867             | Mitcham Common              |
| TQ1684       | Grand Union Canal              | TQ0392     | Maple Cross                    | TQ2983             | Regent's Canal              |
| TQ1268       | Molesey Reservoirs             | TQ3796     | King George's Reservoir        | TQ4087             | Wanstead Park               |
| TQ2783       | Primrose Hill                  | TQ2966     | Beddington Sewage Works        | TQ2990             | Alexandra Palace            |
| TQ3589       | Walthamstow Reservoirs         | TQ2187     | Brent Reservoir                | TQ2668             | Morden Hall Park            |
| TQ2187       | Brent Reservoir                | TQ2472     | Wimbledon Park                 | TQ3371             | Crystal Palace              |

S3. The ten grid cells with the highest number of records of birds, of flowering plants, and of beetles.

| Birds  |                                | Flowering plants |                                | Beetles |                                |
|--------|--------------------------------|------------------|--------------------------------|---------|--------------------------------|
| TQ2277 | The London Wetland Centre      | TQ2967           | Mitcham Common                 | TQ3587  | Walthamstow Marshes            |
| TQ5280 | Rainham Marshes Nature Reserve | TQ2868           | Mitcham Common                 | TQ5379  | Rainham Marshes RSPB Reserve   |
| TQ2966 | Beddington Farmlands           | TQ2867           | Mitcham Common                 | TQ5088  | Romford                        |
| TQ1268 | Molesley Reservoirs            | TQ2972           | Tooting Bec Common             | TQ3799  | Rammey Marsh/Gunpowder Park    |
| TQ3589 | Walthamstow Reservoir          | TQ1974           | Richmond Park                  | TQ3798  | Enfield Lock                   |
| TQ2783 | Regent's Park                  | TQ2983           | Regent's Canal                 | TQ4379  | Woolwich                       |
| TQ2187 | Brent Reservoir                | TQ3283           | Regent's Canal                 | TQ5282  | Rainham Marshes Nature Reserve |
| TQ2780 | Hyde Park                      | TQ2277           | The London Wetland Centre      | TQ5180  | Rainham Marshes Nature Reserve |
| TQ0493 | Stocker's Lake                 | TQ3083           | Camley Street Natural Park     | TQ3579  | Rainham Marshes Nature Reserve |
| TQ1669 | Bushy Park                     | TQ5280           | Rainham Marshes Nature Reserve | TQ4682  | Creekmouth                     |

S4. The ten most recorded species and their relative abundance within their taxonomic group in each data set for the informal taxonomic groups of birds, flowering plants and beetles.

| Taxonomic group  | Species from GiGL                                   | Species from iSpot                                             | Species from iRecord                                      |
|------------------|-----------------------------------------------------|----------------------------------------------------------------|-----------------------------------------------------------|
| Birds            | Blackbird (2.15%)<br><i>Turdus merula</i>           | Grey heron (3.7%)<br><i>Ardea cinerea</i>                      | Blackbird (8.74%)<br><i>Turdus merula</i>                 |
|                  | Robin (2.06%)<br><i>Erithacus rubecula</i>          | Mallard (3.15%)<br><i>Anas platyrhynchos</i>                   | Robin (7.66%)<br><i>Erithacus rubecula</i>                |
|                  | Tufted duck (1.83%)<br><i>Aythya fuligula</i>       | Robin (2.74%)<br><i>Erithacus rubecula</i>                     | House sparrow (7.12%)<br><i>Passer domesticus</i>         |
|                  | House sparrow (1.77%)<br><i>Passer domesticus</i>   | Ring-necked parakeet (2.68%)<br><i>Psittacula krameri</i>      | Blue tit (6.05%)<br><i>Cyanistes caeruleus</i>            |
|                  | Sparrowhawk (1.65%)<br><i>Accipiter nisus</i>       | Tufted duck (2.62%)<br><i>Aythya fuligula</i>                  | Woodpigeon (5.65%)<br><i>Columba palumbus</i>             |
|                  | Mallard (1.55%)<br><i>Anas platyrhynchos</i>        | Egyptian goose (2.56%)<br><i>Alopochen aegyptiacus</i>         | Magpie (4.17%)<br><i>Pica pica</i>                        |
|                  | Woodpigeon (1.54%)<br><i>Columba palumbus</i>       | Black-headed gull (2.50%)<br><i>Chroicocephalus ridibundus</i> | Ring-necked parakeet (3.76%)<br><i>Psittacula krameri</i> |
|                  | Coot (1.51%)<br><i>Fulica atra</i>                  | Moorhen (2.26%)<br><i>Gallinula chloropus</i>                  | Swift (3.63)<br><i>Apus apus</i>                          |
|                  | Wren (1.46%)<br><i>Troglodytes troglodytes</i>      | Coot (2.20%)<br><i>Fulica atra</i>                             | Great tit (2.96%)<br><i>Parus major</i>                   |
|                  | Chiffchaff (1.40%)<br><i>Phylloscopus collybita</i> | Mute swan (2.20%)<br><i>Cygnus olor</i>                        | Starling (2.96%)<br><i>Sturnus vulgaris</i>               |
| Flowering plants | Redshank (13%)<br><i>Persicaria maculosa</i>        | Herb-robert (1%)<br><i>Geranium robertianum</i>                | Japanese knotweed (5%)<br><i>Fallopia japonica</i>        |
|                  | Common ivy (5.5%)<br><i>Hedera helix</i>            | Pedunculate oak (0.8%)<br><i>Quercus robur</i>                 | Common ivy (2.9%)<br><i>Hedera helix</i>                  |
|                  | Common holly (1.6%)<br><i>Ilex aquifolium</i>       | Black horehound (0.7%)<br><i>Ballota nigra</i>                 | Common nettle (2.9%)<br><i>Urtica dioica</i>              |
|                  | Pedunculate oak (1.2%)<br><i>Quercus robur</i>      | Spindle (0.7%)<br><i>Euonymus europaeus</i>                    | Herb-robert (2.8%)<br><i>Geranium robertianum</i>         |

|         |                                                                                                |                                                                                                             |                                                                         |
|---------|------------------------------------------------------------------------------------------------|-------------------------------------------------------------------------------------------------------------|-------------------------------------------------------------------------|
|         | European ash (0.9%)<br><i>Fraxinus excelsior</i>                                               | Common mallow (0.7%)<br><i>Malva sylvestris</i>                                                             | European ash (2.5%)<br><i>Fraxinus excelsior</i>                        |
|         | Sycamore (0.6%)<br><i>Acer pseudoplatanus</i>                                                  | Green alkanet (0.7%)<br><i>Pentaglottis sempervirens</i>                                                    | Ribwort plantain (2.3%)<br><i>Plantago lanceolata</i>                   |
|         | Common nettle (0.6%)<br><i>Urtica dioica</i>                                                   | Common ragwort (0.7%)<br><i>Jacobaea vulgaris</i>                                                           | Common hawthorn (2.2%)<br><i>Crataegus monogyna</i>                     |
|         | Common hawthorn (0.6%)<br><i>Crataegus monogyna</i>                                            | Bluebell (0.7%)<br><i>Hyacinthoides non-scripta</i>                                                         | Daisy (2.2%)<br><i>Bellis perennis</i>                                  |
|         | Common elder (0.5%)<br><i>Sambucus nigra</i>                                                   | Lesser celandine (0.7%)<br><i>Ranunculus ficaria</i>                                                        | Cleavers (2.1%)<br><i>Galium aparine</i>                                |
|         | Cow parsley (0.5%)<br><i>Anthriscus sylvestris</i><br>Cleavers (0.5%)<br><i>Galium aparine</i> | Common birds-foot-trefoil (0.6%)<br><i>Lotus corniculatus</i><br>Red campion (0.6%)<br><i>Silene dioica</i> | Red clover (1.9%)<br><i>Trifolium pratense</i>                          |
| Beetles | Stag beetle (43%)<br><i>Lucanus cervus</i>                                                     | Harlequin ladybird (17.5%)<br><i>Harmonia axyridis</i>                                                      | Harlequin ladybird (52%)<br><i>Harmonia axyridis</i>                    |
|         | Seven spot ladybird (1.3%)<br><i>Coccinella septempunctata</i>                                 | Seven spot ladybird (4.8%)<br><i>Coccinella septempunctata</i>                                              | Seven spot ladybird (12%)<br><i>Coccinella septempunctata</i>           |
|         | Twenty-two spot ladybird (1.0%)<br><i>Psyllobora vigintiduopunctata</i>                        | Stag beetle (4.8%)<br><i>Lucanus cervus</i>                                                                 | Two spot ladybird (10%)<br><i>Adalia bipunctata</i>                     |
|         | <i>Odemera lurida</i> (0.9%)                                                                   | <i>Oedemera nobilis</i> (4.7%)                                                                              | Ten spot ladybird (3.8%)<br><i>Adalia decempunctata</i>                 |
|         | <i>Sitona lineatus</i> (0.9%)                                                                  | Fourteen spot ladybird (3.0%)<br><i>Propylea quattuordecimpunctata</i>                                      | Twenty two spot ladybird (3.1%)<br><i>Psyllobora vigintiduopunctata</i> |
|         | Two spot ladybird (0.8%)<br><i>Adalia bipunctata</i>                                           | Rosemary leaf beetle (2.9%)<br><i>Chrysolina americana</i>                                                  | Fourteen spot ladybird (2.6%)<br><i>Propylea quattuordecimpunctata</i>  |
|         | Twenty-four spot ladybird (0.8%)<br><i>Subcoccinella vigintiquatuorpunctata</i>                | Lesser stag beetle (2.3%)<br><i>Dorcus parallelipipedus</i>                                                 | Pine ladybird (2.6%)<br><i>Exochomus quadripustulatus</i>               |
|         | Adonis ladybird (0.7%)<br><i>Hippodamia variegata</i>                                          | Varied carpet beetle (2.1%)<br><i>Anthrenus verbasci</i>                                                    | Orange ladybird (2.1%)<br><i>Halyzia sedecimguttata</i>                 |
|         | Fourteen spot ladybird (0.7%)                                                                  | Wasp beetle (2.1%)                                                                                          | Twenty-four spot ladybird (1.6%)                                        |



|  |                                       |                                                                                                                                             |                                                                  |
|--|---------------------------------------|---------------------------------------------------------------------------------------------------------------------------------------------|------------------------------------------------------------------|
|  | <i>Propylea quattuordecimpunctata</i> | <i>Clytus arietis</i>                                                                                                                       | <i>Subcoccinella vigintiquattuor punctata</i>                    |
|  | <i>Oedemera nobilis</i> (0.6%)        | Two spot ladybird (2.0%)<br><i>Adalia bipunctata</i><br>Rose chafer<br><i>Cetonia aurata</i><br>Spotted longhorn<br><i>Rutpela maculata</i> | Eleven spot ladybird (1.2%)<br><i>Coccinella undecimpunctata</i> |
